# Supplementary material for: Rice β-Glucosidase 4 (Os1βGlu4) Regulates the Hull Pigmentation via Accumulation of Salicylic Acid
Source: MDPI journal article supplement (doi:10.3390/ijms231810646), 2022-09-13
Supplement: s1 [file s1]

**Table S1.** The primer used in this study.

| Primer name                           | Primer name               | Primer sequence (5'-3')     |
|---------------------------------------|---------------------------|-----------------------------|
| <b>Map-based cloning</b>              |                           |                             |
| RM6581-F                              |                           | GCTCGAGAACCATGTGGGATAGC     |
| RM6581-R                              |                           | CCCACCTCGTTCTCCTTCTCC       |
| RM7650-F                              |                           | TTACAGTCAAGGTCTCGCTCTCG     |
| RM7650-R                              |                           | TCGGAAGACCACTCACTCTCTCC     |
| RM3632-F                              |                           | GGTGAAATACACGGTGACTTGAGG    |
| RM3632-R                              |                           | TGGTTCTTCTTCAGCAGTGTCC      |
| RM1261-F                              |                           | ATGGTAGAGACACAAGTCCATGC     |
| RM1261-R                              |                           | GACAAATTGGTGTAGGTGAAGG      |
| 1-20-F                                |                           | AAGGAGAAGTGGAGGTTAAGATAGGG  |
| 1-20-R                                |                           | GTTAATTTACTGACCGGCCATGC     |
| 1-21-F                                |                           | GTGATGCTTTCGTCGTCGTTGG      |
| 1-21-R                                |                           | GGAGGACAAGAACAAGAACAAGAACG  |
| <b>CRISPR/Cas9 vector</b>             |                           |                             |
| U6AL- <i>Osbg1</i> -F                 | AAACTGCTAGATGCTACTg       | tttagagctagaaat             |
| U6AL- <i>Os-bg1</i> -R                | AGTAGCATCTAGCAGTTTCC      | ggcagccaagccagca            |
| U-F                                   | CTCCGTTTTACCTGTGGAATCG    |                             |
| gR-R                                  | CGGAGGAAAATTCCATCCAC      |                             |
| Pps-F                                 | TTCAGAggtctcTctcg         | ACTAGTATGGAATCGGCAGCAAAG    |
| Pgs-R                                 | AGCGTGggtctcGaccg         | ACGCGTATCCATCCACTCCAAGCTC   |
| <b>Complementation and GFP vector</b> |                           |                             |
| F                                     | ATGGGGAGCACGGGGCGC        |                             |
| R                                     | GCCTTCGTTCTGCAGCAACC      |                             |
| L-F                                   | ctgtacaaggagctcggatcc     | ATGGGGAGCACGGGGCGC          |
| L-R                                   | caggctcgactctagaggatcc    | GCCTTCGTTCTGCAGCAACC        |
| Promotor-F                            | TGAGTGCACCACCATTTCAGATAA  |                             |
| Promotor-R                            | GAGGCGTGAAGAAGACTTGTGC    |                             |
| Com/pro-F                             | gagctcggtacccgggatcc      | TGAGTGCACCACCATTTCAGATAA    |
| Com/pro-R                             | catGAGGCGTGAAGAAGACTTGTGC |                             |
| Com/CDS-F                             | agtcttcttcacgcctc         | ATGGGGAGCACGGGGCGC          |
| Com/CDS-R                             | cttgcatgcctgcaggtcgac     | CTAGTTCATGTCAGCTTTGTTCTCAGC |
| <b>GUS vector</b>                     |                           |                             |
| Pro-F                                 | tggctgcaggtcgacggatcc     | TGAGTGCACCACCATTTCAGATAA    |
| Pro-R                                 | tcttagaattcccgggatcc      | GAGGCGTGAAGAAGACTTGTGC      |
