# Supplementary figures and images for: Rice β-Glucosidase 4 (Os1βGlu4) Regulates the Hull Pigmentation via Accumulation of Salicylic Acid
Source: MDPI journal article supplement (doi:10.3390/ijms231810646), 2022-09-13

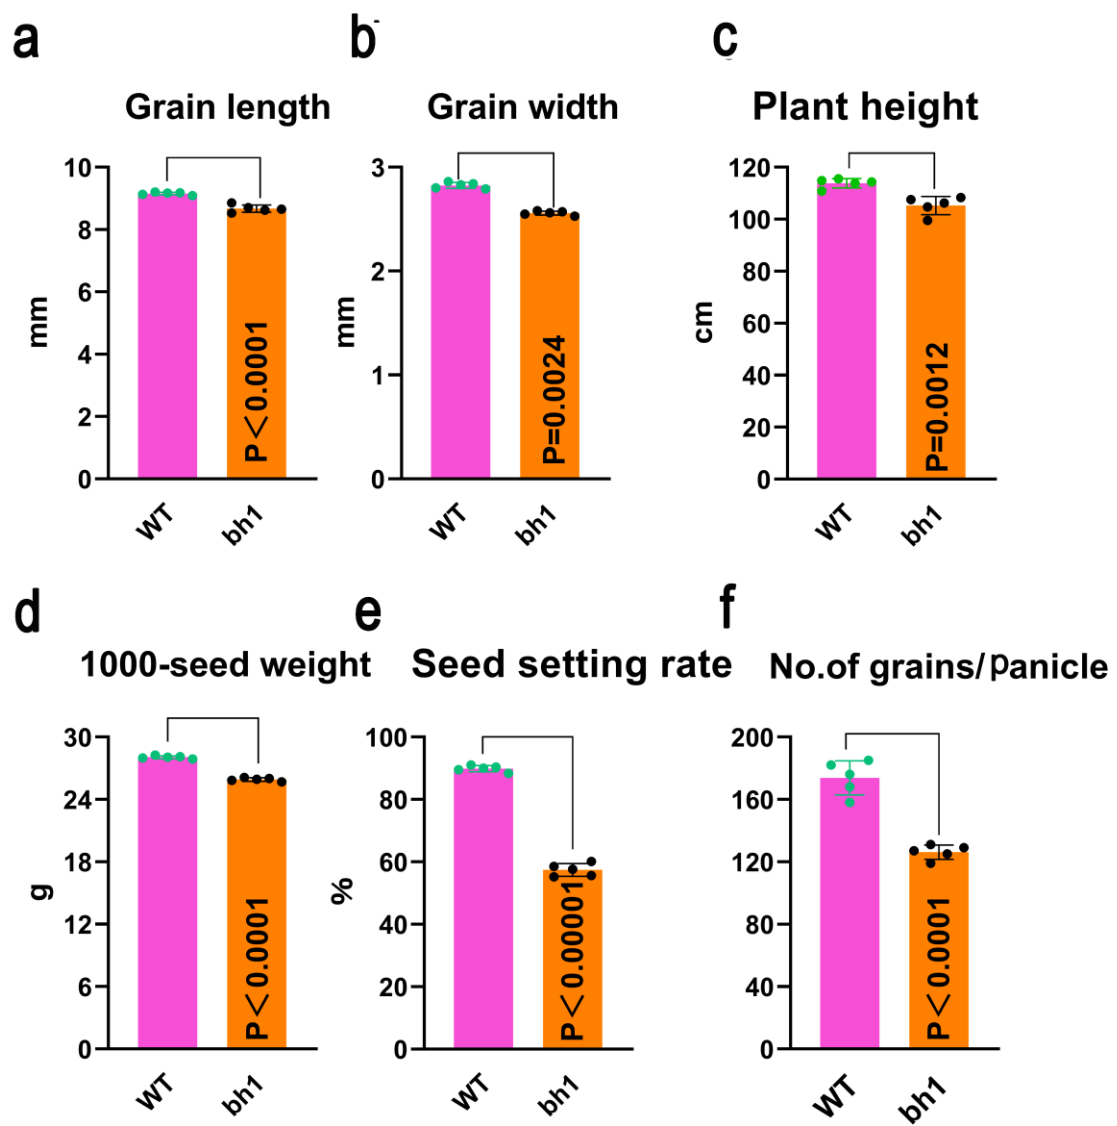

Figure S1.

Supplement: s1 [file s1]
